# Supplementary material for: Noise reduction and quantification of fiber orientations in greyscale images
Source: PubMed Central journal article supplement (PMC6964846; doi:10.1371/journal.pone.0227534), 2020-01-16
Supplement: pone.0227534.s001.pdf [file pone.0227534.s001.pdf]

| $\Delta_{\text{MC}}[\%]$ | <i>Lena</i><br>512×512 | <i>Boat</i><br>256×256 | <i>Cameraman</i><br>512×512 |
|--------------------------|------------------------|------------------------|-----------------------------|
| total deviation          | 0.02 ± 2.15            | 0.01 ± 3.10            | 0.01 ± 2.26                 |
| without boundary         | -0.16 ± 0.44           | -0.36 ± 0.62           | -0.17 ± 0.72                |
| boundary                 | 23.11 ± 5.54           | 23.32 ± 6.33           | 22.73 ± 8.18                |
