# Supplementary material for: Noise reduction and quantification of fiber orientations in greyscale images
Source: PubMed Central journal article supplement (PMC6964846; doi:10.1371/journal.pone.0227534), 2020-01-16
Supplement: pone.0227534.s002.pdf [file pone.0227534.s002.pdf]

|                               | <i>Lena</i>   | <i>Boat</i>   | <i>Cameraman</i> |
|-------------------------------|---------------|---------------|------------------|
| $\Delta_{\text{MC}}[\%]$      | 512×512       | 256×256       | 512×512          |
| total deviation               | 59.32 ± 26.48 | 36.97 ± 25.11 | 53.06 ± 28.32    |
| $\delta_{\text{cut}} = 100\%$ | -7.83 ± 5.51  | -8.09 ± 5.46  | -7.97 ± 5.47     |
| $\delta_{\text{cut}} = 50\%$  | -2.44 ± 1.70  | -2.54 ± 1.73  | -2.97 ± 1.68     |
| $\delta_{\text{cut}} = 10\%$  | -0.22 ± 0.16  | -0.22 ± 0.16  | -0.21 ± 0.16     |
